# Supplementary material for: Structure-Dependent Eco-Toxicity of Vegetable Tannin
Source: MDPI journal article supplement (doi:10.3390/pr10050816), 2022-04-21
Supplement: s1 [file s1]

Supplementary

# Structure-Dependent Eco-Toxicity of Vegetable Tannin

Faming He <sup>1,2</sup>, Liangqiong Peng <sup>1</sup>, Wenjun Long <sup>2</sup>, Xiaofeng Jiang <sup>1</sup> and Wenhua Zhang <sup>1,2,\*</sup>

<sup>1</sup> The Key Laboratory of Leather Chemistry and Engineering of Ministry of Education, Sichuan University, Chengdu 610065, China; hefaming@stu.scu.edu.cn (F.H.); penglq68@gmail.com (L.P.); jiangchenfeng@gmail.com (X.J.)

<sup>2</sup> National Engineering Laboratory for Clean Technology of Leather Manufacture, Sichuan University, Chengdu 610065, China; longwenjun@stu.scu.edu.cn

\* Correspondence: zhangwh@scu.edu.cn

**Citation:** He, F.; Peng, L.; Long, W.; Jiang, X.; Zhang, W. Structure-Dependent Eco-Toxicity of Vegetable Tannin. *Processes* **2022**, *10*, 816. <https://doi.org/10.3390/pr10050816>

Academic Editor: Ángeles Alonso-Moraga

Received: 30 March 2022

Accepted: 19 April 2022

Published: 21 April 2022

Number of page: 7; Number of tables: 2; Number of figures: 3

**Publisher's Note:** MDPI stays neutral with regard to jurisdictional claims in published maps and institutional affiliations.

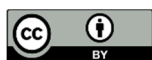

**Copyright:** © 2022 by the authors. Submitted for possible open access publication under the terms and conditions of the Creative Commons Attribution (CC BY) license (<https://creativecommons.org/licenses/by/4.0/>).

## **Section**

**Section S1. Method for culturing *P. phosphoreum***

**Section S2. The fitting equations**

**Section S3. The binding site of luciferase**

**Section S4 3D-diagrams and 2D-diagrams of CDOCKER results**

**Section S5. Molecular dynamics**

## Section S1. Method for culturing *P. phosphoreum*

Freeze-dried *P. phosphoreum* was purchased from Shenzhen Langshi Biological Instrument Co., Ltd.. The reagent was stored at  $-20\text{ }^{\circ}\text{C}$  and rehydrated before inoculation. The complete culture medium was listed in Table S1. The 100 mL liquid culture medium was contained in 250 mL conical flasks which were occluded with a cotton plug and paper and then sterilized with a high-pressure steam for 20 min at  $120\text{ }^{\circ}\text{C}$ . Precultured *P. phosphoreum* was inoculated in the complete medium, then maintained at  $20^{\circ}\text{C}$  with a shaking speed of 200 rpm. Bacteria were grown in the liquid medium up to the logarithmic growth stage after 18 h, which could be used for toxicity assay [22,28].

**Table S1.** Culture medium of *P. phosphoreum*.

| Name                                                 | Purity | Mass (g) |
|------------------------------------------------------|--------|----------|
| Tryptone                                             |        | 5.00     |
| Yeast extract                                        |        | 5.00     |
| NaCl                                                 | AR     | 30.00    |
| $\text{Na}_2\text{HPO}_4 \cdot 12\text{H}_2\text{O}$ | AR     | 12.61    |
| $\text{K}_2\text{HPO}_4 \cdot 3\text{H}_2\text{O}$   | AR     | 6.55     |
| Glycerin                                             | AR     | 3.00     |
| Distilled water                                      |        | 1000.00  |

## Section S2. The fitting equations

**Table S2.** Regression models describing the concentration-response curves of vegetable tannin and model compounds.

| Materials and Chemicals |                       | The Regression Model                                                         | R      |
|-------------------------|-----------------------|------------------------------------------------------------------------------|--------|
| Hydrolyzed tannin       | Tara tannin           | $y = \frac{121.64}{1 + e^{-8.23 \times (x - 0.21)}}$                         | 0.9813 |
|                         | Valonia tannin        | $y = -1.70 + \frac{371.15}{1 + 10^{-0.67 \times (-0.47 - x)}}$               | 0.9981 |
|                         | Larch tannin          | $y = 1.22 + \frac{120.29 - 1.22}{1 + 10^{-1.24 \times (0.68 - x)}}$          | 0.9990 |
| Condensed tannin        | Wattle tannin         | $y = -9.79 + \frac{139.89 - 9.79}{1 + 10^{-0.61 \times (0.71 - x)}}$         | 0.9942 |
|                         | Baberry tannin        | $y = -104.60 + \frac{101.69 - 104.60}{1 + (\frac{x}{7.12})^{0.78}}$          | 0.9995 |
|                         | Acacia mangium tannin | $y = -31.34 + \frac{116.56 - 31.34}{1 + (\frac{x}{2.96})^{1.23}}$            | 0.9989 |
| Model compounds         | GA                    | $y = -9.17 + \frac{146.69 - 9.17}{1 + 10^{-0.0020 \times (288.52 - x)}}$     | 0.9901 |
|                         | CAT                   | $y = 7.37 + \frac{128.61 - 7.37}{1 + 10^{-0.0012 \times (570.11 - x)}}$      | 0.9986 |
|                         | EGC                   | $y = -24.96 + \frac{141.56 - 24.96}{1 + 10^{-0.00025 \times (1921.62 - x)}}$ | 0.9891 |

### Section S3. The binding site of luciferase

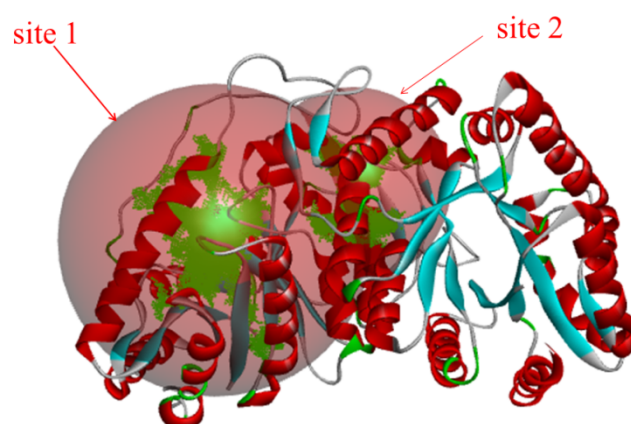

**Figure S1.** The binding site of luciferase.

## Section S4. 3D-diagrams and 2D-diagrams of CDOCKER results

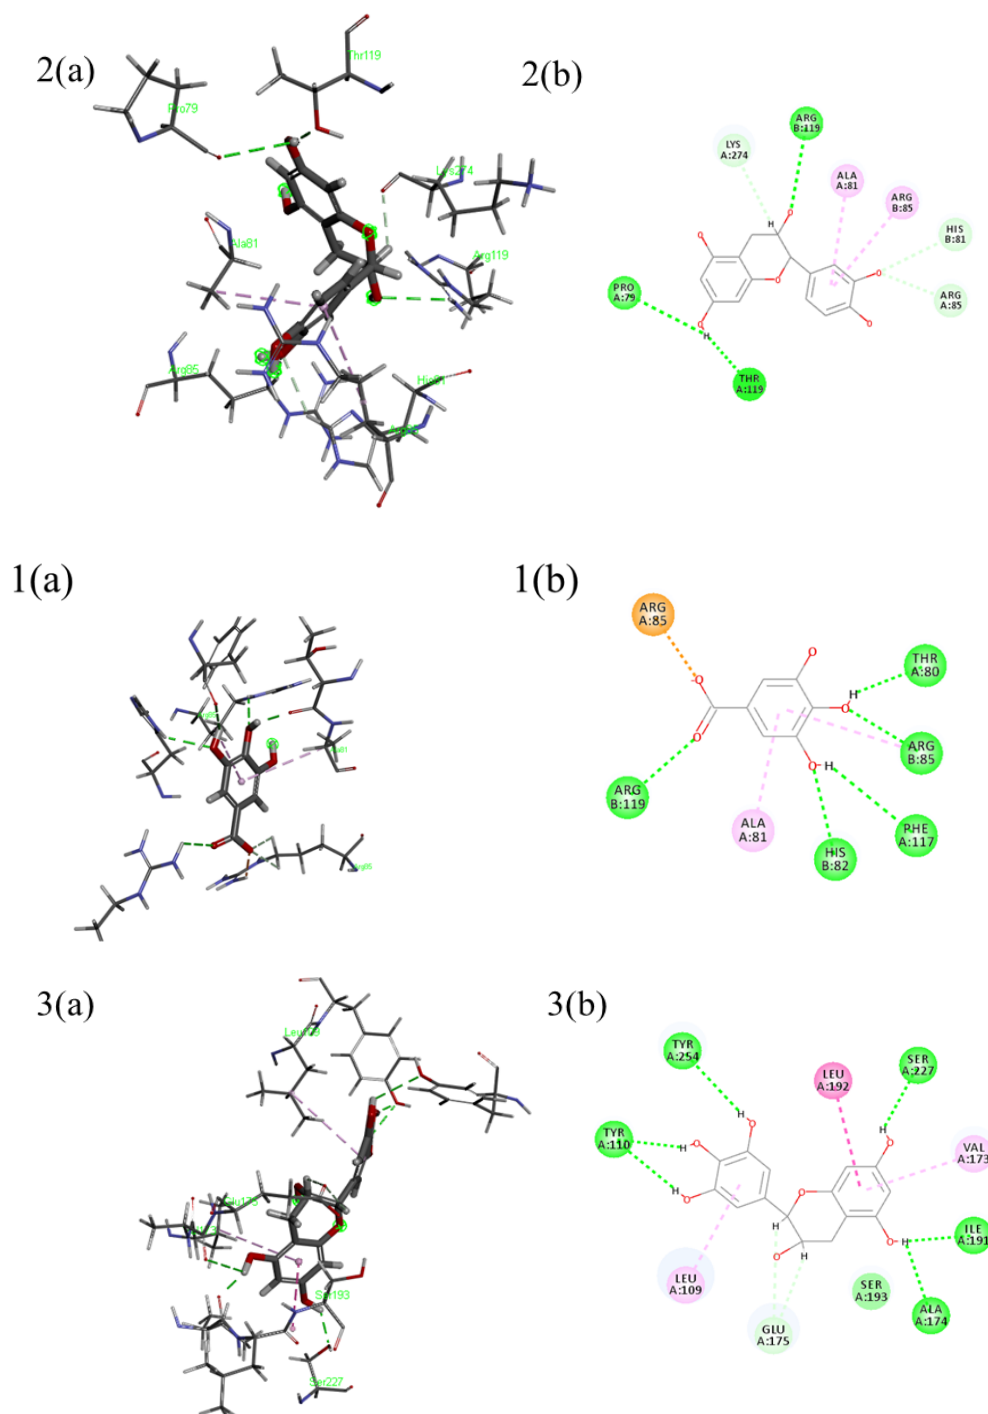

**Figure S2.** The preferential conformations of complex formed by luciferase with model compounds from CDOCKER (1: GA, 2: CAT, 3: EGC. (a): 3D-diagram (b): 2D-diagram. For the interaction, Pi bond was set as purple line, the hydrogen bond was set as green line, the van der Waals was set as light green and salt bridge was set as orange.).

## Section S5. Molecular dynamics

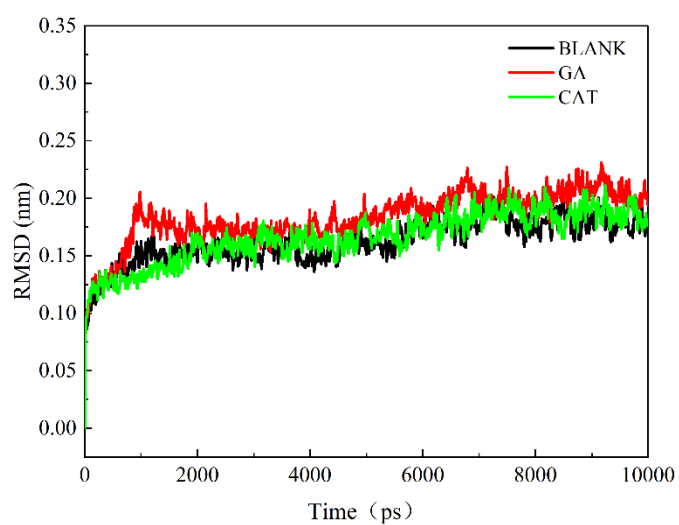

**Figure S3.** Times dependence of root-mean-square deviations (RMSD).
